# Supplementary material for: Origin and effect of In–Sn ordering in InSnCo3S2: a neutron diffraction and DFT study
Source: Royal Society of Chemistry journal article supplement (doi:10.1039/c4ra03800b), 2014-01-01
Supplement: c4ra03800b1.pdf [file c4ra03800b1.pdf]

# Origin and effect of In-Sn ordering in $\text{InSnCo}_3\text{S}_2$ : a neutron diffraction and DFT study

Jan Rothballer,<sup>a</sup> Frederik Bachhuber,<sup>a,b</sup> Stefan M. Rommel,<sup>a</sup> Tilo Söhnel<sup>a,c,\*</sup> and Richard Wehrich<sup>a,\*</sup>

Supplementary information

Content

1. VASP data including novel optimisations
2. Comparison of VASP-PAW and CRYSTAL-PBE optimisations
3. Parameters from CRYSTAL09 and CRYSTAL98 calculations

1. VASP data including novel optimisations

Table S1: Crystal structure data from VASP PAW-PBE optimisations for partial site occupation

| Scheme | In/% | Sn/% | $a_{\text{sup}}/\text{Å}$ | $\alpha_{\text{sup}}/^\circ$ | $V_{\text{sup}}/\text{Å}^3$ | $V_{\text{prim}}/\text{Å}^3$ | $a_{\text{rh}}/\text{Å}$ | $\alpha_{\text{rh}}/^\circ$ | $a_{\text{hex}}/\text{Å}$ | $2a_{\text{hex}}/\text{Å}$ | $c_{\text{hex}}/\text{Å}$ |
|--------|------|------|---------------------------|------------------------------|-----------------------------|------------------------------|--------------------------|-----------------------------|---------------------------|----------------------------|---------------------------|
|        | 0    | 100  | 7.598                     | 89.976                       | 438.500                     | 109.660                      | 5.374                    | 59.980                      | 5.372                     | 10.744                     | 13.164                    |
| a      | 12.5 | 87.5 | 7.596                     | 89.587                       | 438.200                     | 109.550                      | 5.390                    | 59.530                      | 5.352                     | 10.704                     | 13.250                    |
| b      | 12.5 | 87.5 | 7.600                     | 89.927                       | 438.920                     | 109.730                      | 5.377                    | 59.920                      | 5.371                     | 10.741                     | 13.179                    |
| a      | 37.5 | 62.5 | 7.609                     | 88.580                       | 440.150                     | 110.038                      | 5.447                    | 58.390                      | 5.314                     | 10.627                     | 13.502                    |
| b      | 37.5 | 62.5 | 7.611                     | 89.829                       | 440.870                     | 110.218                      | 5.390                    | 59.800                      | 5.373                     | 10.747                     | 13.222                    |
| a      | 50   | 50   | 7.616                     | 88.074                       | 441.070                     | 110.239                      | 5.475                    | 57.820                      | 5.294                     | 10.587                     | 13.628                    |
| b      | 50   | 50   | 7.617                     | 88.457                       | 441.370                     | 110.361                      | 5.458                    | 58.250                      | 5.313                     | 10.626                     | 13.543                    |
| c      | 50   | 50   | 7.615                     | 89.276                       | 441.440                     | 110.333                      | 5.418                    | 59.170                      | 5.354                     | 10.708                     | 13.354                    |
| d      | 50   | 50   | 7.616                     | 89.754                       | 441.700                     | 110.425                      | 5.397                    | 59.720                      | 5.374                     | 10.748                     | 13.247                    |
| a      | 62   | 38   | 7.619                     | 89.347                       | 442.156                     | 110.539                      | 5.519                    | 58.062                      | 5.357                     | 10.713                     | 13.346                    |
| b      | 62   | 38   | 7.618                     | 88.201                       | 441.453                     | 110.363                      | 5.471                    | 57.965                      | 5.301                     | 10.603                     | 13.603                    |
| a      | 88   | 12   | 7.632                     | 88.261                       | 443.897                     | 110.974                      | 5.478                    | 58.031                      | 5.314                     | 10.628                     | 13.614                    |
| b      | 88   | 12   | 7.628                     | 88.562                       | 443.411                     | 110.853                      | 5.461                    | 58.366                      | 5.326                     | 10.651                     | 13.539                    |
|        | 100  | 0    | 7.639                     | 88.231                       | 445.091                     | 111.273                      | 5.484                    | 57.998                      | 5.317                     | 10.635                     | 13.633                    |

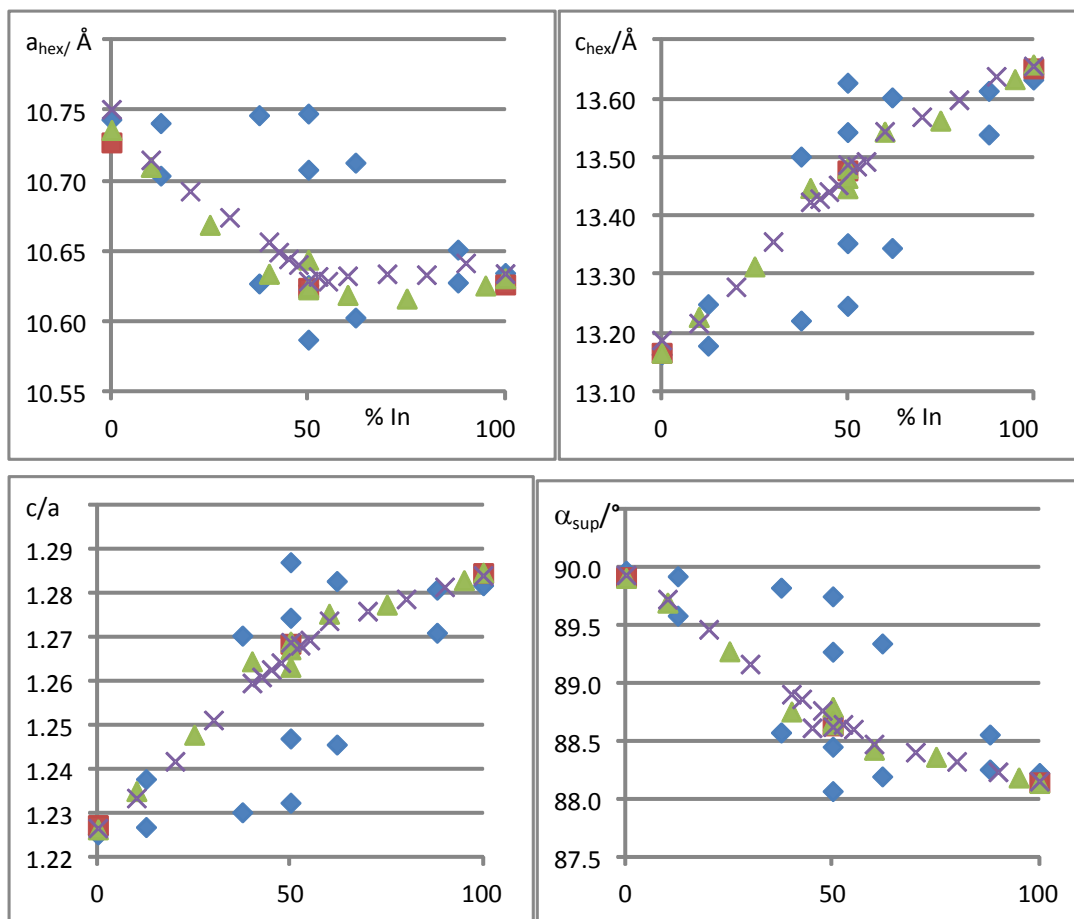

Fig. S2: Summarized crystal structure data obtained from VASP PAW-PBE optimisations for ordered structures of  $\text{In}_x\text{Sn}_{2-x}\text{Co}_3\text{S}_2$  (diamond symbol) and compared to experimental XRD (cross, triangle) and Neutron (square) diffraction data.

## 2. Comparison of VASP-PAW and CRYSTAL-PBE optimisations

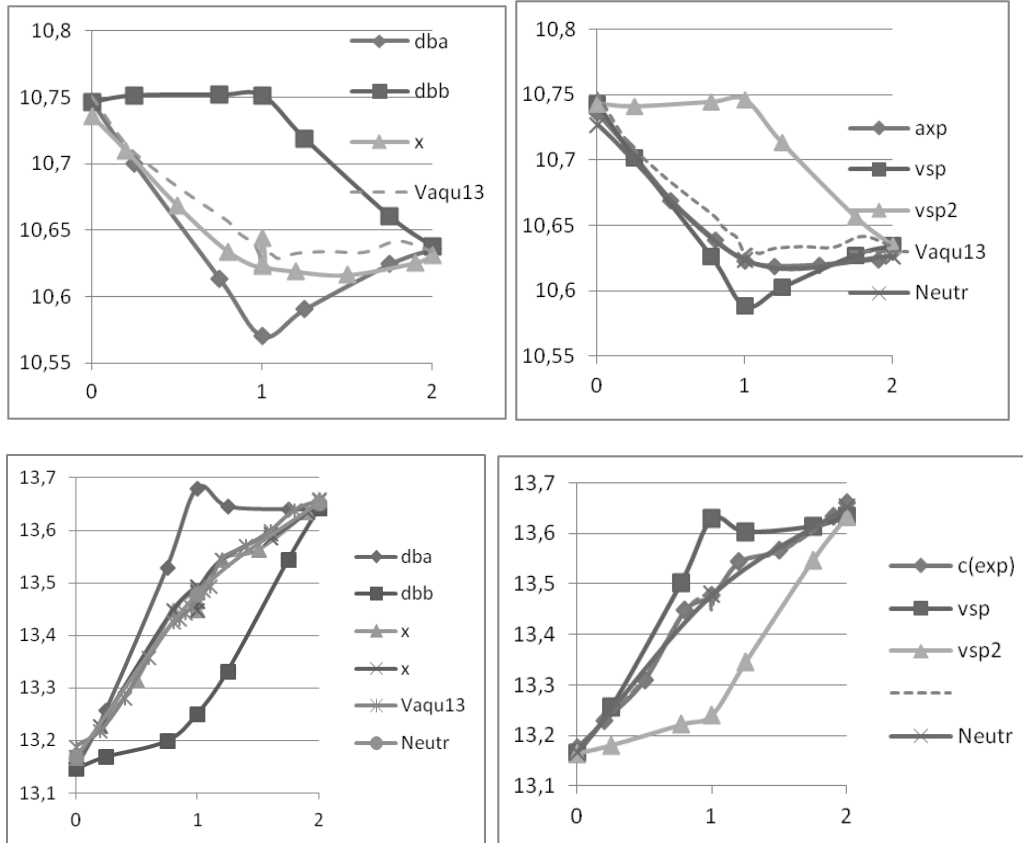

Fig. S1: Optimisations of  $a_{\text{hex}}$  (top) and  $c_{\text{hex}}$  axis (bottom) from VASP-PAW-PBE (right) and CRYSTAL-PBE (left) compared to data from Weihrich et al. (2006, Ref. 4b), Vaqueiro et al. (2013, Ref. 8), and present neutron data; dba and dbb (CRYSTAL09 calculations) as well as vsp and vsp2 denote the respective ordering variants with In and Sn preferably on A1 and A2 sites.

Table S2: Crystal structure data from VASP PAW-PBE optimisations for partial site occupation

| x(In) | $a_{\text{sup}}/\text{\AA}$ | $\alpha_{\text{sup}}/^\circ$ | $V_{\text{sup}}/\text{\AA}^3$ | $V_{\text{rh}}/\text{\AA}^3$ | 2 a     | $a_{\text{hex}}/\text{\AA}$ |
|-------|-----------------------------|------------------------------|-------------------------------|------------------------------|---------|-----------------------------|
| 0     | 7.598                       | 89.98                        | 438.5                         | 109.625                      | 10.7433 | 13.1647                     |
| 0.25  | 7.596                       | 89.57                        | 438.2                         | 109.55                       | 10.702  | 13.25503                    |
| 0.77  | 7.60909                     | 88.58                        | 440.15                        | 110.0375                     | 10.6267 | 13.502                      |
| 1     | 7.61627                     | 88.0745                      | 441                           | 110.25                       | 10.5885 | 13.6278                     |
| 1.25  | 7.61795                     | 88.2                         | 441.45                        | 110.3625                     | 10.6027 | 13.6027                     |
| 1.75  | 7.6317                      | 88.26                        | 443.41                        | 110.8525                     | 10.6277 | 13.6139                     |
| 2     | 7.6387                      | 88.23                        | 445.1                         | 111.275                      | 10.6346 | 13.6332                     |

| x(In) | $a_{\text{sup}}/\text{\AA}$ | $\alpha_{\text{sup}}/^\circ$ | $V_{\text{sup}}/\text{\AA}^3$ | $V_{\text{rh}}/\text{\AA}^3$ | 2 a     | $a_{\text{hex}}/\text{\AA}$ |
|-------|-----------------------------|------------------------------|-------------------------------|------------------------------|---------|-----------------------------|
| 0     | 7.598                       | 89.98                        | 438.5                         | 109.625                      | 10.7433 | 13.1647                     |
| 0.25  | 7.6                         | 89.927                       | 438.9                         | 109.725                      | 10.7412 | 13.1804                     |
| 0.77  | 7.6095                      | 89.82                        | 440.9                         | 110.225                      | 10.7445 | 13.2214                     |
| 1     | 7.614                       | 89.77                        | 441.7                         | 110.425                      | 10.7462 | 13.2407                     |
| 1.25  | 7.6188                      | 89.35                        | 442.16                        | 110.54                       | 10.7133 | 13.3450                     |
| 1.75  | 7.6279                      | 88.56                        | 443.9                         | 110.975                      | 10.6564 | 13.5466                     |
| 2     | 7.639                       | 88.23                        | 445.1                         | 111.275                      | 10.6346 | 13.6332                     |

Table S3: Crystal structure data from CRYSTAL (PBE) optimisations (from Ref. 6)

| x(In) | $a_{\text{sup}}/\text{\AA}$ | $\alpha_{\text{sup}}/^\circ$ | 2 $a_{\text{hex}}/\text{\AA}$ | $c_{\text{hex}}/\text{\AA}$ | $V_{\text{sup}}/\text{\AA}^3$ | $V_{\text{rh}}/\text{\AA}^3$ |
|-------|-----------------------------|------------------------------|-------------------------------|-----------------------------|-------------------------------|------------------------------|
| 0     | 7.596                       | 90.048                       | 10.747                        | 13.146                      | 438.270                       | 109.568                      |
| 0.25  | 7.596                       | 89.556                       | 10.700                        | 13.258                      | 438.169                       | 109.542                      |
| 0.75  | 7.608                       | 88.457                       | 10.614                        | 13.528                      | 439.909                       | 109.977                      |
| 1     | 7.618                       | 87.855                       | 10.570                        | 13.680                      | 441.265                       | 110.316                      |
| 1.25  | 7.621                       | 88.030                       | 10.591                        | 13.646                      | 441.830                       | 110.458                      |
| 1.75  | 7.635                       | 88.172                       | 10.625                        | 13.640                      | 444.482                       | 111.120                      |
| 2     | 7.641                       | 88.200                       | 10.636                        | 13.641                      | 445.500                       | 111.375                      |

| x(In) | $a_{\text{sup}}/\text{\AA}$ | $\alpha_{\text{sup}}/^\circ$ | 2 $a_{\text{hex}}/\text{\AA}$ | $c_{\text{hex}}/\text{\AA}$ | $V_{\text{sup}}/\text{\AA}^3$ | $V_{\text{rh}}/\text{\AA}^3$ |
|-------|-----------------------------|------------------------------|-------------------------------|-----------------------------|-------------------------------|------------------------------|
| 0     | 7.596                       | 90.048                       | 10.747                        | 13.146                      | 438.270                       | 109.568                      |
| 0.25  | 7.603                       | 89.998                       | 10.752                        | 13.169                      | 439.430                       | 109.858                      |
| 0.75  | 7.609                       | 89.913                       | 10.752                        | 13.199                      | 440.465                       | 110.116                      |
| 1     | 7.618                       | 89.761                       | 10.751                        | 13.250                      | 442.140                       | 110.535                      |
| 1.25  | 7.619                       | 89.409                       | 10.719                        | 13.331                      | 442.163                       | 110.541                      |
| 1.75  | 7.633                       | 88.582                       | 10.660                        | 13.544                      | 444.300                       | 111.075                      |
| 2     | 7.642                       | 88.220                       | 10.638                        | 13.641                      | 445.600                       | 111.400                      |

Table S4: Crystal structure data from vasp optimisations

a = 7.6164 Å,  $\alpha = 88.04^\circ$   
In 0,0,0  
Sn 0,0,-1/2  
In 0,-1/2,-1/2  
Sn -1/2,-1/2,-1/2  
Co -0.0000003754,-0.25,-0.25  
Co 0.25,-1/2,-0.25  
S 0.27860,0.77860,0.77860  
S 0.27860,0.27860,0.27860

7.6165, 88.42  
Sn 0,0,0  
Sn 0,0,1/2  
In 0,1/2,1/2  
In 1/2,1/2,1/2  
Co 0.0057,0.75748,0.75748  
Co 0.2479,0.500,0.752093  
S 0.2861,0.7769,0.776915  
S 0.27383,0.2738,0.27382

7.6051, 89.37  
In 0,0,0  
In 0,0,-1/2  
Sn 0,-1/2,-1/2  
Sn -1/2,-1/2,-1/2  
Co -0.00529,-0.25737,-0.25737  
Co 0.25176,-1/2,-0.25176  
S 0.2786,0.7786,0.7786  
S 0.2786,0.2786,0.2786

7.6145, 89.77  
Sn 0,0,0  
In 0,0,-1/2  
Sn 0,-1/2,-1/2  
In -1/2,-1/2,-1/2  
Co 0.0000,-0.25000,-0.2500  
Co 0.2500,-1/2,-0.2500  
S 0.27864,0.77864,0.77864  
S 0.27864,0.27864,0.27864

### 3. Parameters from CRYSTAL09 calculations

Table S5: Parameters for combined cell/atom optimisation control with CRYSTAL09

Initial trust radius 0.50000 Maximum trust radius 4.00000  
Max. Gradient component 0.00045 Max. displacement Component 0.00180  
R.M.S. of gradient component 0.00030 R.M.S. of displacement components 0.00120  
Threshold on energy change 0.100E-06 Extrapolating polynomial order 2  
Maximum allowed number of steps 100 Sorting of energy points NO  
Analytical gradient; hessian updating scheme: BFGS  
Step size numerical gradient 0.00100  
Initial hessian matrix: Schlegel model 2

Table S6: CRYSTAL basis sets

50 10  
0 0 9 2.0 1.0458  
3806666.0 0.0000486  
563891.0 0.000387

122419.0 0.00226  
31093.6 0.0112  
8965.23 0.0463  
2854.46 0.1549  
1010.09 0.3509  
400.714 0.4274  
167.996 0.1915  
0 1 7 8.0 1.0525  
10902.6 -0.000294 0.00105  
2533.25 -0.00619 0.00956  
776.793 -0.0529 0.0566  
275.142 -0.1471 0.217  
110.753 0.1297 0.4521  
51.0837 0.6009 0.4376  
24.547 0.4365 0.1928  
0 1 6 8.0 1.0627  
237.278 0.00651 -0.0141  
92.5742 -0.0316 -0.0688  
38.7016 -0.3216 0.0254  
17.4351 -0.00044 0.8574  
8.1474 0.9163 1.2949  
3.8907 0.4327 0.4281  
0 3 6 10.0 1.0  
353.314 0.0133  
105.158 0.0929  
39.3208 0.2993  
16.2335 0.4698  
7.0573 0.3195  
2.8399 0.0524  
0 1 3 8.0 1.0  
7.1527 -4.6228 -0.0721  
3.4236 1.5501 0.5727  
1.5342 10.7304 0.9749  
0 1 1 4.0 1.0  
0.6743 1.0 1.0  
0 3 3 10.0 1.0  
5.4496 0.2114  
2.1373 0.5395  
0.8455 0.4545  
0 3 1 0.0 1.0  
0.3154 1.0  
0 1 1 0.0 1.0  
0.2873 1.0 1.0  
0 1 1 0.0 1.0  
0.14 1.0 1.0  
49 10  
0 0 9 2.0 1.0229  
3806666.0 0.0000487  
565677.0 0.000386  
122672.0 0.00225  
31208.0 0.0112  
8973.58 0.0464  
2855.32 0.1551  
1009.92 0.3512  
400.013 0.427  
167.569 0.1887  
0 1 7 8.0 1.0262  
11017.4 -0.00033 0.00104  
2546.93 -0.00642 0.00957  
778.611 -0.0539 0.0566  
275.526 -0.1475 0.2171  
110.525 0.1374 0.4533  
50.5711 0.6125 0.4345  
24.3037 0.4209 0.1836  
0 1 6 8.0 1.0314

239.102 0.00648 -0.0146  
92.7375 -0.0325 -0.0705  
39.0152 -0.3244 0.0317  
17.4499 0.0117 0.8767  
8.1698 0.9158 1.2929  
3.9132 0.4324 0.441  
0 3 6 10.0 1.0  
342.52 0.0128  
102.01 0.0894  
38.0838 0.2915  
15.6905 0.4663  
6.77 0.3293  
2.7107 0.0554  
0 1 3 8.0 1.0  
6.5969 -4.5838 -0.0762  
3.1744 1.9149 0.5664  
1.4127 9.9244 0.8942  
0 1 1 13.0 1.0  
0.6351 1.0 1.0  
0 3 3 10.0 1.0  
5.0783 0.1939  
1.9711 0.5072  
0.7589 0.4477  
0 3 1 10.0 1.0  
0.315 1.0  
0 1 1 10.0 1.0  
0.285 1.0 1.0  
0 1 1 10.0 1.0  
0.14 1.0 1.0  
27 8  
0 0 8 2.0 1.0  
341701.0 0.000227  
48850.0 0.001929  
10400.9 0.0111  
2718.99 0.0501  
819.661 0.1705  
283.878 0.3692  
111.017 0.4033  
46.4757 0.1433  
0 1 6 8.0 1.0  
855.558 -0.0054 0.0088  
206.504 -0.0684 0.062  
69.0516 -0.1316 0.2165  
27.2653 0.2616 0.4095  
11.5384 0.6287 0.3932  
4.2017 0.2706 0.225  
0 1 4 8.0 1.0  
51.5542 0.0182 -0.0287  
18.9092 -0.2432 -0.0937  
7.7251 -0.849 0.2036  
3.5428 0.8264 1.4188  
0 1 1 2.0 1.0  
1.4914 1.0 1.0  
0 1 1 0.0 1.0  
0.6031 1.0 1.0  
0 1 1 0 1  
0.15 1 1  
0 3 4 7.0 1.0  
29.9009 0.0617  
8.1164 0.2835  
2.6433 0.529  
0.8869 0.4976  
0 3 1 0.0 1.0  
0.29 1.0  
16 6

0 0 8 2.0 1.0  
109211.0 0.0002520  
16235.206 0.0019934  
3573.0286 0.0111177  
943.23811 0.0498945  
287.26179 0.1661455  
99.914226 0.3627018  
38.602137 0.4108787  
15.531224 0.1457875  
0 1 6 8.0 1.0  
281.22171 -0.0057780 0.0081427  
67.106575 -0.0665855 0.0565570  
21.794135 -0.1203552 0.2039582  
8.2097646 0.2741310 0.3973328  
3.4178289 0.6463829 0.3946313  
1.5452225 0.2925792 0.1544345  
0 1 3 6.0 1.0  
4.3752432 -0.1750000 -0.0613439  
1.8096201 -0.5938952 0.1272251  
0.6833985 0.8298996 1.2215893  
0 1 1 0.0 1.0  
0.28 1.0 1.0  
0 1 1 0.0 1.0  
0.18 1.0 1.0  
0 3 1 0.0 1.0  
0.45 1.0  
  
216 3  
DURAND  
0 1 3 6.0 1.0  
2.827768 -0.354607 -0.056186  
2.093537 0.688656 0.0456255  
0.491587 -0.656475 0.537546  
0 1 1 0.0 1.0  
0.185 1.0 1.0  
0 3 1 0.0 1.0  
0.45 1.0
